# Supplementary material for: C2-Alkylation of N-pyrimidylindole with vinylsilane via cobalt-catalyzed C–H bond activation
Source: publisher site journal article supplement (doi:10.3762/bjoc.8.174), 2012-09-14

**Supporting Information**  
**for**  
**C2-Alkylation of *N*-pyrimidylindole with vinylsilane via**  
**cobalt-catalyzed C–H bond activation**

Zhenhua Ding and Naohiko Yoshikai\*

Address: Division of Chemistry and Biological Chemistry, School of Physical and  
Mathematical Sciences, Nanyang Technological University, Singapore 637371, Singapore

Email: Naohiko Yoshikai - nyoshikai@ntu.edu.sg

\* Corresponding author

**Experimental details and characterization data of new compounds**

**Contents**

|                                                                    |     |
|--------------------------------------------------------------------|-----|
| Materials and Methods .....                                        | S2  |
| C2-Alkylation of <i>N</i> -pyrimidyl indole with vinylsilane ..... | S3  |
| Removal of the pyrimidyl group .....                               | S9  |
| References .....                                                   | S9  |
| <sup>1</sup> H and <sup>13</sup> C NMR spectra .....               | S10 |

## Materials and Methods

**General.** All reactions dealing with air or moisture-sensitive compounds were performed by standard Schlenk techniques in oven-dried reaction vessels under a nitrogen atmosphere. Analytical thin-layer chromatography (TLC) was performed on Merck 60 F254 silica gel plates.  $^1\text{H}$  and  $^{13}\text{C}$  nuclear magnetic resonance (NMR) spectra were recorded on a Bruker AV-400 (400 MHz/100 MHz) NMR spectrometer.  $^1\text{H}$  and  $^{13}\text{C}$  NMR spectra are reported in parts per million (ppm) downfield from an internal standard, tetramethylsilane (0 ppm) and  $\text{CHCl}_3$  (77.0 ppm), respectively. Gas chromatographic (GC) analysis was performed on a Shimadzu GC-2010 system equipped with an FID detector and a capillary column, DB-5 (Agilent J&W, 0.25 mm i.d. x 30 m, 0.25  $\mu\text{m}$  film thickness). High-resolution mass spectra (HRMS) were obtained with a Q-Tof Premier LC HR mass spectrometer.

**Materials.** Unless otherwise noted, reagents were purchased from Aldrich, Alfa Aesar, and other commercial suppliers and were used as received. THF was distilled over Na/benzophenone. Cyclohexylmagnesium bromide was prepared from bromocyclohexane and magnesium turnings in anhydrous THF and titrated before use. Sodium ethoxide was prepared from sodium and ethanol just before use. Anhydrous  $\text{CoBr}_2$  (99%) was purchased from Aldrich. *N*-Pyrimidyl indoles were prepared according to the literature procedure [1,2].

## C2-Alkylation of *N*-pyrimidyl indole with vinylsilane

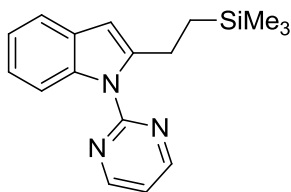

**Typical Procedure: 1-(Pyrimidin-2-yl)-2-(2-(trimethylsilyl)ethyl)-1*H*-indole (3aa).** In a Schlenk tube were placed 1-(pyrimidin-2-yl)-1*H*-indole (58.6 mg, 0.3 mmol), CoBr<sub>2</sub> (6.6 mg, 0.03 mmol), and bathocuproine (10.8 mg, 0.03 mmol), which were then dissolved in THF (1.3 mL). To the solution was added cyclohexylmagnesium bromide (0.60 M in THF, 0.3 mL, 0.18 mmol) at 0 °C. After stirring for 30 min at this temperature, vinyltrimethylsilane (66 μL, 0.45 mmol) was added. The reaction mixture was stirred at 60 °C for 12 h, and then quenched with saturated aqueous solution of NH<sub>4</sub>Cl (1.5 mL). The resulting mixture was extracted with ethyl acetate (10 mL × 3). The combined organic layer was dried over Na<sub>2</sub>SO<sub>4</sub> and concentrated under reduced pressure. Purification of the crude product by silica gel chromatography (eluent: hexane/EtOAc = 100/1) afforded the title compound as a colorless oil (61.2 mg, 69%). The 5 mmol scale reaction was performed according to a similar procedure by using a 100 mL Schlenk tube to afford the same product in 68% yield.

*R*<sub>f</sub> 0.39 (hexane/EtOAc = 10/1); <sup>1</sup>H NMR (400 MHz, CDCl<sub>3</sub>): δ 8.80 (d, *J* = 4.8 Hz, 2 H), 8.24 (d, *J* = 8.0 Hz, 1 H), 7.54–7.52 (m, 1 H), 7.23–7.13 (m, 3 H), 6.50 (s, 1 H), 3.20–3.16 (m, 2 H), 0.86–0.82 (m, 2 H), 0.02 (s, 9 H); <sup>13</sup>C NMR (100 MHz, CDCl<sub>3</sub>): δ 158.3, 158.1, 145.0, 137.1, 129.4, 122.3, 121.7, 119.6, 117.0, 113.7, 105.1, 23.8, 16.5, –1.8; HRMS (ESI) Calcd for C<sub>17</sub>H<sub>21</sub>N<sub>3</sub>Si [M + H]<sup>+</sup> 296.1583, found 296.1584.

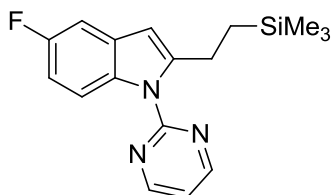

**5-Fluoro-1-(pyrimidin-2-yl)-2-(2-(trimethylsilyl)ethyl)-1*H*-indole (3ba):** 55% yield; colorless oil; *R*<sub>f</sub> 0.37 (hexane/EtOAc = 10/1); <sup>1</sup>H NMR (400 MHz, CDCl<sub>3</sub>): δ 8.78 (d, *J* = 4.8 Hz, 2 H), 8.23–8.19 (m, 1 H), 7.18–7.14 (m, 2 H), 6.95–6.90 (m, 1 H), 6.45 (s, 1 H), 3.19–3.15 (m,

2 H), 0.85–0.81 (m, 2 H), 0.02 (s, 9 H);  $^{13}\text{C}$  NMR (100 MHz,  $\text{CDCl}_3$ ):  $\delta$  158.9 (d,  $^1J_{\text{C-F}} = 236$  Hz), 158.2, 158.1, 146.8, 133.4, 130.1 (d,  $^3J_{\text{C-F}} = 10.0$  Hz), 117.1, 114.8 (d,  $^3J_{\text{C-F}} = 9.1$  Hz), 109.9 (d,  $^2J_{\text{C-F}} = 24.8$  Hz), 104.9, 104.8 (d,  $^2J_{\text{C-F}} = 27.0$  Hz), 24.1, 16.5, -1.8; HRMS (ESI) Calcd for  $\text{C}_{17}\text{H}_{20}\text{FN}_3\text{Si}$   $[\text{M} + \text{H}]^+$  314.1489, found 314.1491.

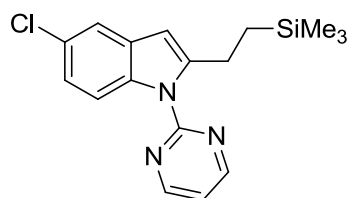

**5-Chloro-1-(pyrimidin-2-yl)-2-(2-(trimethylsilyl)ethyl)-1H-indole (3ca):** 39% yield; yellow oil;  $R_f$  0.38 (hexane/EtOAc = 10/1);  $^1\text{H}$  NMR (400 MHz,  $\text{CDCl}_3$ ):  $\delta$  8.79 (d,  $J = 4.8$  Hz, 2 H), 8.17 (d,  $J = 8.8$  Hz, 1 H), 7.47 (d,  $J = 2.1$  Hz, 1 H), 7.19–7.13 (m, 2 H), 6.43 (s, 1 H), 3.18–3.14 (m, 2 H), 0.84–0.80 (m, 2 H), 0.01 (s, 9 H);  $^{13}\text{C}$  NMR (100 MHz,  $\text{CDCl}_3$ ):  $\delta$  158.14, 158.09, 146.5, 135.4, 130.5, 127.1, 122.3, 119.1, 117.2, 114.9, 104.5, 24.0, 16.4, -1.8; HRMS (ESI) Calcd for  $\text{C}_{17}\text{H}_{20}\text{ClN}_3\text{Si}$   $[\text{M} + \text{H}]^+$  330.1193, found 330.1190.

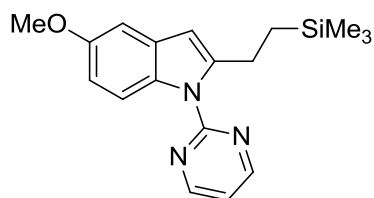

**5-Methoxy-1-(pyrimidin-2-yl)-2-(2-(trimethylsilyl)ethyl)-1H-indole (3da):** 62% yield; colorless oil;  $R_f$  0.32 (hexane/EtOAc = 10/1);  $^1\text{H}$  NMR (400 MHz,  $\text{CDCl}_3$ ):  $\delta$  8.75 (d,  $J = 4.8$  Hz, 2 H), 8.22 (d,  $J = 9.0$  Hz, 1 H), 7.09 (t,  $J = 4.8$  Hz, 1 H), 7.01 (d,  $J = 2.5$  Hz, 1 H), 6.87–6.84 (m, 1 H), 6.43 (s, 1 H), 3.87 (s, 3 H), 3.21–3.17 (m, 2 H), 0.87–0.83 (m, 2 H), 0.03 (s, 9 H);  $^{13}\text{C}$  NMR (100 MHz,  $\text{CDCl}_3$ ):  $\delta$  158.3, 157.9, 155.3, 145.8, 132.0, 130.1, 116.6, 114.9, 111.1, 105.1, 102.2, 55.7, 24.1, 16.6, -1.8; HRMS (ESI) Calcd for  $\text{C}_{18}\text{H}_{23}\text{N}_3\text{OSi}$   $[\text{M} + \text{H}]^+$  326.1689, found 326.1690.

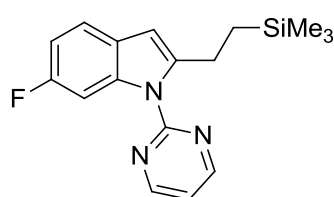

**6-Fluoro-1-(pyrimidin-2-yl)-2-(2-(trimethylsilyl)ethyl)-1H-indole (3ea):** 52% yield; colorless oil;  $R_f$  0.47 (hexane/EtOAc = 10/1);  $^1\text{H}$  NMR (400 MHz,  $\text{CDCl}_3$ ):  $\delta$  8.78 (d,  $J$  = 4.8 Hz, 2 H), 8.08–8.04 (m, 1 H), 7.44–7.40 (m, 1 H), 7.15 (t,  $J$  = 4.8 Hz, 1 H), 6.97–6.92 (m, 1 H), 6.46 (s, 1 H), 3.19–3.15 (m, 2 H), 0.85–0.81 (m, 2 H), 0.02 (s, 9 H);  $^{13}\text{C}$  NMR (100 MHz,  $\text{CDCl}_3$ ):  $\delta$  160.0 (d,  $^1J_{\text{C-F}}$  = 235 Hz), 158.2, 158.1, 145.5 (d,  $^4J_{\text{C-F}}$  = 3.8 Hz), 137.1 (d,  $^3J_{\text{C-F}}$  = 12.5 Hz), 125.6, 119.9 (d,  $^3J_{\text{C-F}}$  = 9.9 Hz), 117.1, 109.8 (d,  $^2J_{\text{C-F}}$  = 24.0 Hz), 104.8, 101.3 (d,  $^2J_{\text{C-F}}$  = 28.4 Hz), 24.0, 16.5, –1.8; HRMS (ESI) Calcd for  $\text{C}_{17}\text{H}_{20}\text{FN}_3\text{Si}$   $[\text{M} + \text{H}]^+$  314.1489, found 314.1494.

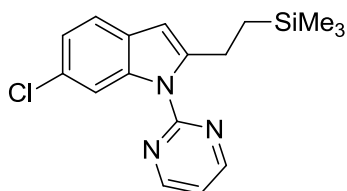

**6-Chloro-1-(pyrimidin-2-yl)-2-(2-(trimethylsilyl)ethyl)-1H-indole (3fa):** 43% yield; colorless oil;  $R_f$  0.44 (hexane/EtOAc = 10/1);  $^1\text{H}$  NMR (400 MHz,  $\text{CDCl}_3$ ):  $\delta$  8.81 (d,  $J$  = 4.8 Hz, 2 H), 8.29 (s, 1 H), 7.41 (d,  $J$  = 8.3 Hz, 1 H), 7.20–7.13 (m, 2 H), 6.45 (s, 1 H), 3.18–3.13 (m, 2 H), 0.83–0.79 (m, 2 H), 0.01 (s, 9 H);  $^{13}\text{C}$  NMR (100 MHz,  $\text{CDCl}_3$ ):  $\delta$  158.2, 158.1, 145.9, 137.4, 128.1, 127.9, 122.2, 120.2, 117.3, 114.1, 104.8, 23.9, 16.5, –1.8; HRMS (ESI) Calcd for  $\text{C}_{17}\text{H}_{20}\text{ClN}_3\text{Si}$   $[\text{M} + \text{H}]^+$  330.1193, found 330.1192.

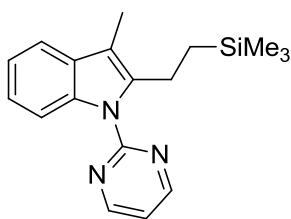

**3-Methyl-1-(pyrimidin-2-yl)-2-(2-(trimethylsilyl)ethyl)-1H-indole (3ga):** 42% yield; white solid;  $R_f$  0.42 (hexane/EtOAc = 10/1);  $^1\text{H}$  NMR (400 MHz,  $\text{CDCl}_3$ ):  $\delta$  8.77 (d,  $J$  = 4.8 Hz, 2 H), 8.26–8.24 (m, 1 H), 7.50–7.48 (m, 1 H), 7.22–7.20 (m, 2 H), 7.11 (t,  $J$  = 4.8 Hz, 1 H), 3.18–3.14 (m, 2 H), 2.29 (s, 3 H), 0.73–0.69 (m, 2 H), 0.01 (s, 9 H);  $^{13}\text{C}$  NMR (100 MHz,  $\text{CDCl}_3$ ):  $\delta$  158.4, 158.0, 139.9, 136.1, 130.6, 122.5, 121.4, 117.8, 116.6, 113.5, 111.6, 20.4, 17.3, 8.7, –1.9; HRMS (ESI) Calcd for  $\text{C}_{18}\text{H}_{23}\text{N}_3\text{Si}$   $[\text{M} + \text{H}]^+$  310.1740, found 310.1743.

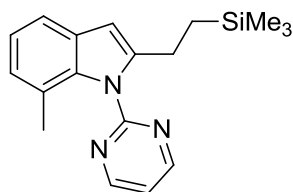

**7-Methyl-1-(pyrimidin-2-yl)-2-(2-(trimethylsilyl)ethyl)-1H-indole (3ha):** 71% yield; colorless oil;  $R_f$  0.19 (hexane/EtOAc = 10/1);  $^1\text{H}$  NMR (400 MHz,  $\text{CDCl}_3$ ):  $\delta$  8.86 (d,  $J$  = 4.8 Hz, 2 H), 7.45 (d,  $J$  = 7.7 Hz, 1 H), 7.28 (t,  $J$  = 4.8 Hz, 1 H), 7.09 (t,  $J$  = 7.4 Hz, 1 H), 6.95 (d,  $J$  = 7.2 Hz, 1 H), 6.46 (s, 1 H), 2.74–2.69 (m, 2 H), 1.96 (s, 3 H), 0.82–0.78 (m, 2 H), –0.02 (s, 9 H);  $^{13}\text{C}$  NMR (100 MHz,  $\text{CDCl}_3$ ):  $\delta$  159.0, 158.3, 144.9, 136.6, 129.6, 124.7, 121.4, 121.0, 119.0, 117.8, 102.3, 21.8, 19.9, 15.8, –1.9; HRMS (ESI) Calcd for  $\text{C}_{18}\text{H}_{23}\text{N}_3\text{Si}$   $[\text{M} + \text{H}]^+$  310.1740, found 310.1738.

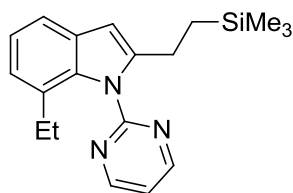

**7-Ethyl-1-(pyrimidin-2-yl)-2-(2-(trimethylsilyl)ethyl)-1H-indole (3ia):** 58% yield; colorless oil;  $R_f$  0.27 (hexane/EtOAc = 10/1);  $^1\text{H}$  NMR (400 MHz,  $\text{CDCl}_3$ ):  $\delta$  8.86 (d,  $J$  = 4.8 Hz, 2 H), 7.44 (d,  $J$  = 6.9 Hz, 1 H), 7.30 (t,  $J$  = 4.8 Hz, 1 H), 7.13 (t,  $J$  = 7.5 Hz, 1 H), 7.02 (d,  $J$  = 7.3 Hz, 1 H), 6.47 (s, 1 H), 2.70–2.65 (m, 2 H), 2.30 (q,  $J$  = 7.5 Hz, 2 H), 0.98 (t,  $J$  = 7.5 Hz, 3 H), 0.81–0.76 (m, 2 H), –0.04 (s, 9 H);  $^{13}\text{C}$  NMR (100 MHz,  $\text{CDCl}_3$ ):  $\delta$  159.5, 158.3, 145.1, 136.0, 129.9, 127.8, 122.5, 121.2, 119.2, 117.9, 102.5, 25.7, 21.9, 15.8, 13.9, –1.9; HRMS (ESI) Calcd for  $\text{C}_{19}\text{H}_{25}\text{N}_3\text{Si}$   $[\text{M} + \text{H}]^+$  324.1896, found 324.1892.

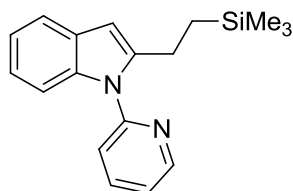

**1-(Pyridin-2-yl)-2-(2-(trimethylsilyl)ethyl)-1H-indole (3ka):** 80% yield; colorless oil;  $R_f$  0.42 (hexane/EtOAc = 10/1);  $^1\text{H}$  NMR (400 MHz,  $\text{CDCl}_3$ ):  $\delta$  8.69–8.67 (m, 1 H), 7.91–7.87 (m, 1 H), 7.62–7.60 (m, 1 H), 7.46 (d,  $J$  = 8.0 Hz, 1 H), 7.38–7.31 (m, 2 H), 7.17–7.14 (m, 2 H), 6.50

(s, 1 H), 2.92–2.88 (m, 2 H), 0.82–0.78 (m, 2 H), –0.02 (s, 9 H);  $^{13}\text{C}$  NMR (100 MHz,  $\text{CDCl}_3$ ):  $\delta$  151.6, 149.5, 144.2, 138.2, 137.3, 128.6, 121.9, 121.5, 120.9, 120.5, 119.9, 109.9, 101.7, 21.9, 15.9, –1.9; HRMS (ESI) Calcd for  $\text{C}_{18}\text{H}_{22}\text{N}_2\text{Si}$   $[\text{M} + \text{H}]^+$  295.1631, found 295.1631.

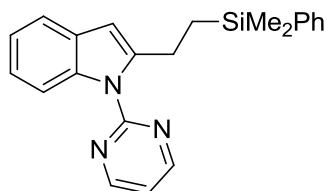

**2-(2-(Dimethyl(phenyl)silyl)ethyl)-1-(pyrimidin-2-yl)-1H-indole (3ab):** 50% yield; colorless oil;  $R_f$  0.33 (hexane/EtOAc = 10/1);  $^1\text{H}$  NMR (400 MHz,  $\text{CDCl}_3$ ):  $\delta$  8.70 (d,  $J$  = 4.8 Hz, 2 H), 8.29 (d,  $J$  = 8.0 Hz, 1 H), 7.57–7.55 (m, 3 H), 7.42–7.39 (m, 3 H), 7.26–7.22 (m, 2 H), 7.09 (t,  $J$  = 4.8 Hz, 1 H), 6.52 (s, 1 H), 3.27–3.23 (m, 2 H), 1.16–1.12 (m, 2 H), 0.34 (s, 6 H);  $^{13}\text{C}$  NMR (100 MHz,  $\text{CDCl}_3$ ):  $\delta$  158.2, 158.0, 144.7, 139.0, 137.0, 133.6, 129.3, 128.9, 127.7, 122.4, 121.7, 119.6, 116.9, 113.8, 105.2, 23.9, 15.9, –3.2; HRMS (ESI) Calcd for  $\text{C}_{22}\text{H}_{23}\text{N}_3\text{Si}$   $[\text{M} + \text{H}]^+$  358.1740, found 358.1738.

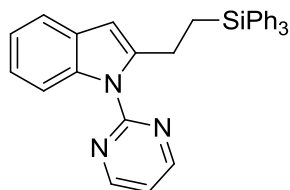

**1-(Pyrimidin-2-yl)-2-(2-(triphenylsilyl)ethyl)-1H-indole (3ac):** 31% yield; white solid;  $R_f$  0.25 (hexane/EtOAc = 10/1);  $^1\text{H}$  NMR (400 MHz,  $\text{CDCl}_3$ ):  $\delta$  8.60 (d,  $J$  = 4.8 Hz, 2 H), 8.36–8.34 (m, 1 H), 7.64–7.57 (m, 7 H), 7.50–7.41 (m, 9 H), 7.28–7.24 (m, 2 H), 7.07 (t,  $J$  = 4.8 Hz, 1 H), 6.58 (s, 1 H), 3.45–3.41 (m, 2 H), 1.84–1.80 (m, 2 H);  $^{13}\text{C}$  NMR (100 MHz,  $\text{CDCl}_3$ ):  $\delta$  158.1, 157.9, 144.6, 137.0, 135.7, 134.8, 129.5, 129.3, 127.9, 122.5, 121.8, 119.7, 116.8, 113.9, 105.3, 24.1, 13.8; HRMS (ESI) Calcd for  $\text{C}_{32}\text{H}_{27}\text{N}_3\text{Si}$   $[\text{M} + \text{H}]^+$  482.2053, found 482.2051.

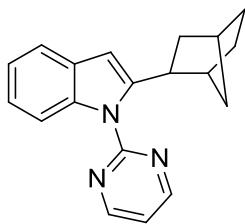

**2-(Bicyclo[2.2.1]heptan-2-yl)-1-(pyrimidin-2-yl)-1*H*-indole (3ad):** 30% yield; colorless oil;  $R_f$  0.33 (hexane/EtOAc = 10/1);  $^1\text{H}$  NMR (400 MHz,  $\text{CDCl}_3$ ):  $\delta$  8.82 (d,  $J$  = 4.8 Hz, 2 H), 8.08–8.06 (m, 1 H), 7.56–7.53 (m, 1 H), 7.21–7.15 (m, 3 H), 6.49 (s, 1 H), 3.71–3.67 (m, 1 H), 2.38–2.29 (m, 2 H), 1.65–1.63 (m, 1 H), 1.58–1.53 (m, 4 H), 1.38–1.34 (m, 1 H), 1.27–1.24 (m, 1 H), 1.17–1.15 (m, 1 H);  $^{13}\text{C}$  NMR (100 MHz,  $\text{CDCl}_3$ ):  $\delta$  158.4, 158.2, 146.9, 137.2, 129.1, 122.3, 121.5, 119.8, 117.3, 112.9, 103.3, 42.3, 40.6, 38.1, 36.8, 36.1, 29.7, 28.9; HRMS (ESI) Calcd for  $\text{C}_{19}\text{H}_{19}\text{N}_3$   $[\text{M} + \text{H}]^+$  290.1657, found 290.1655.



## Removal of the pyrimidyl group

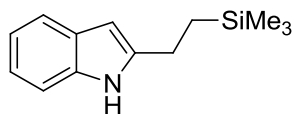

**2-(2-(Trimethylsilyl)ethyl)-1H-indole (4aa):** A mixture of

1-(pyrimidin-2-yl)-2-(2-(trimethylsilyl)ethyl)-1H-indole (**3aa**, 886 mg, 3 mmol) and freshly prepared sodium ethoxide (408 mg, 6 mmol) in DMSO (5 mL) was stirred at 100 °C under nitrogen atmosphere for 20 h. After cooling to ambient temperature, the reaction mixture was extracted with EtOAc (2 × 20 mL), and the combined organic phase was dried over Na<sub>2</sub>SO<sub>4</sub>. After filtration and evaporation of the solvents under reduced pressure, the crude product was purified by column chromatography on silica gel (hexane/EtOAc = 50/1) to yield the title product (554 mg, 85%) as a yellow solid.

$R_f$  0.38 (hexane/EtOAc = 10/1); <sup>1</sup>H NMR (400 MHz, CDCl<sub>3</sub>): δ 7.87 (brs, 1 H), 7.53 (d,  $J$  = 7.6 Hz, 1 H), 7.29 (d,  $J$  = 7.2 Hz, 1 H), 7.14–7.05 (m, 2 H), 6.25 (s, 1 H), 2.80–2.76 (m, 2 H), 1.01–0.96 (m, 2 H), 0.06 (s, 9 H); <sup>13</sup>C NMR (100 MHz, CDCl<sub>3</sub>): δ 142.2, 135.9, 128.8, 120.9, 119.7, 119.5, 110.2, 98.8, 22.5, 15.9, –1.8; HRMS (ESI) Calcd for C<sub>13</sub>H<sub>19</sub>NSi [M + H]<sup>+</sup> 218.1365, found 218.1363

## References

1. Ackermann, L.; Lygin, A. V. *Org. Lett.* **2011**, *13*, 3332–3335.
2. Ding, Z.; Yoshikai, N. *Angew. Chem., Int. Ed.* **2012**, *51*, 4698–4701.

# <sup>1</sup>H and <sup>13</sup>C NMR spectra

DZH-05-108 <sup>1</sup>H NMR 400MHz BBFO2

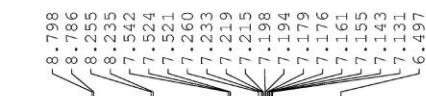

**3aa**

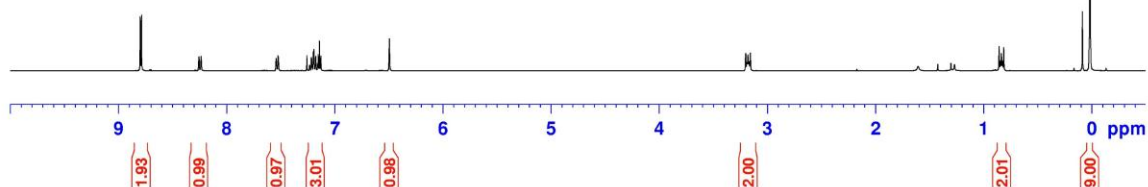

DZH-05-108 <sup>13</sup>C NMR 400MHz BBFO2

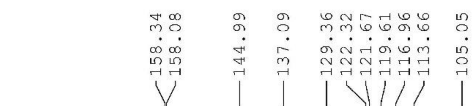

**3aa**

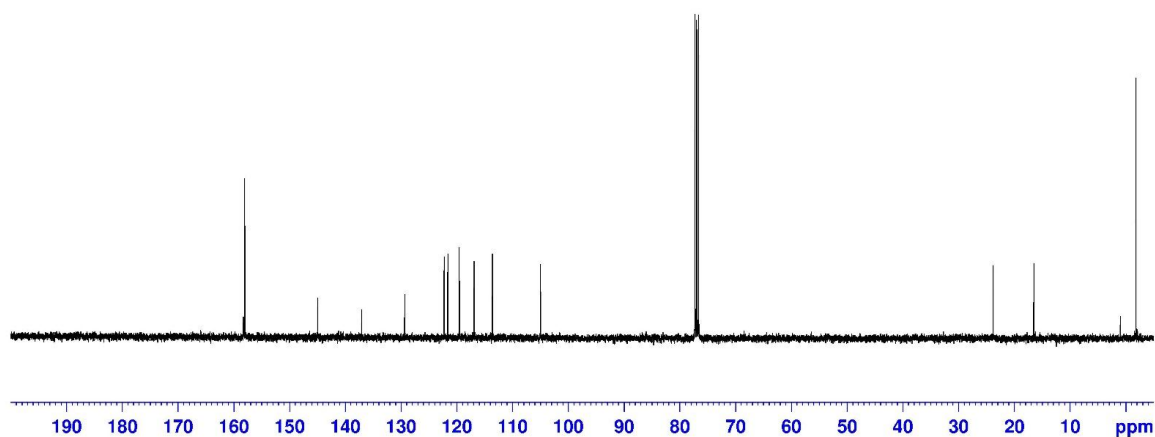

DZH-05-095 <sup>1</sup>H NMR CDCl<sub>3</sub> BBOF1 400MHz

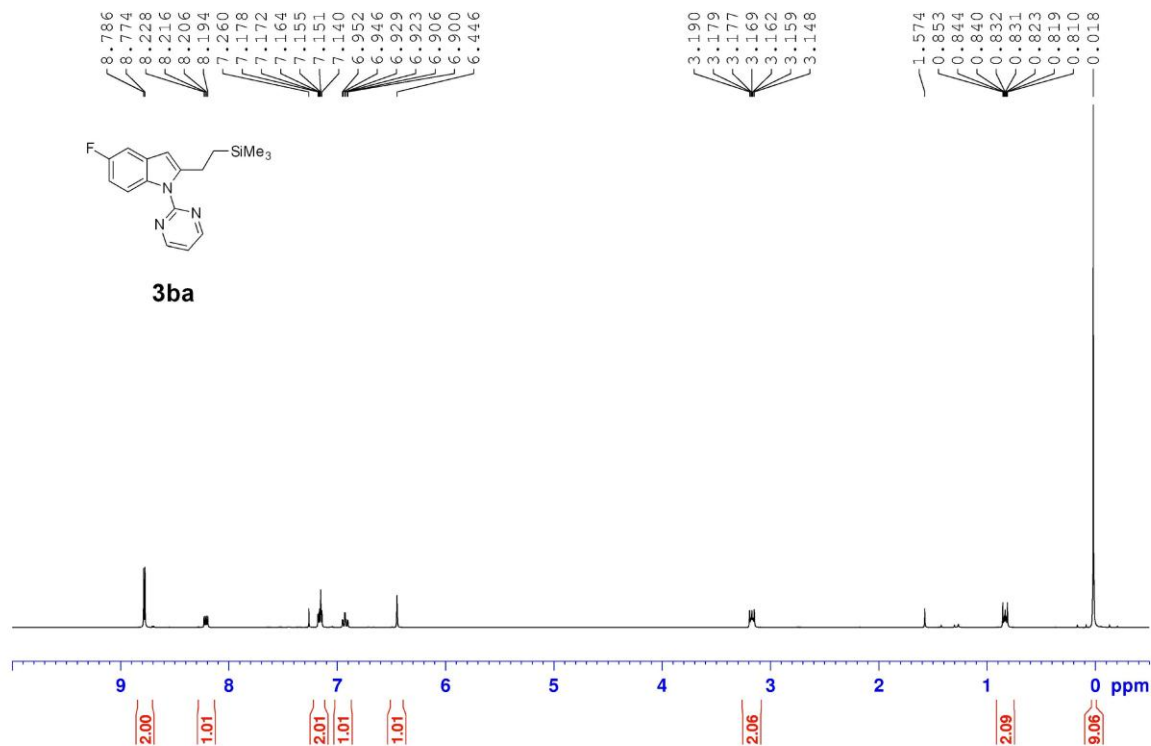

DZH-05-095 <sup>13</sup>C NMR CDCl<sub>3</sub> BBOF1 400MHz

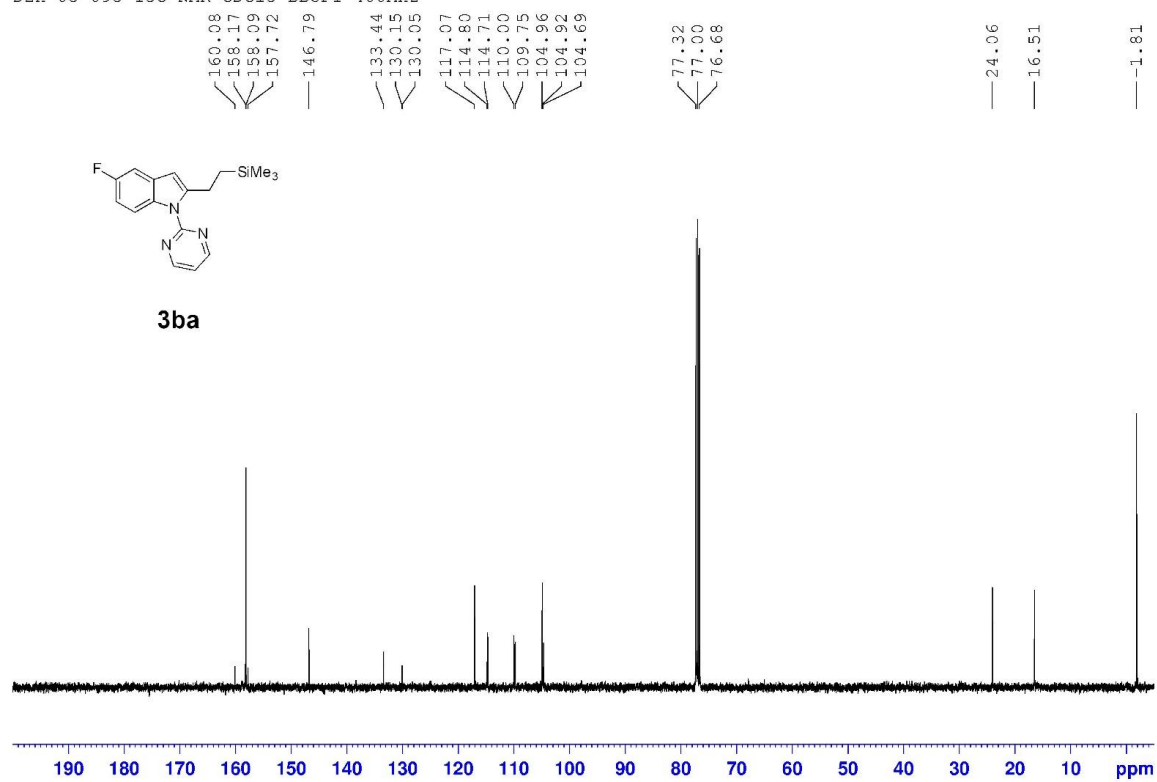

DZH-05-119 <sup>1</sup>H NMR CDCl<sub>3</sub> BBOF1 400MHz

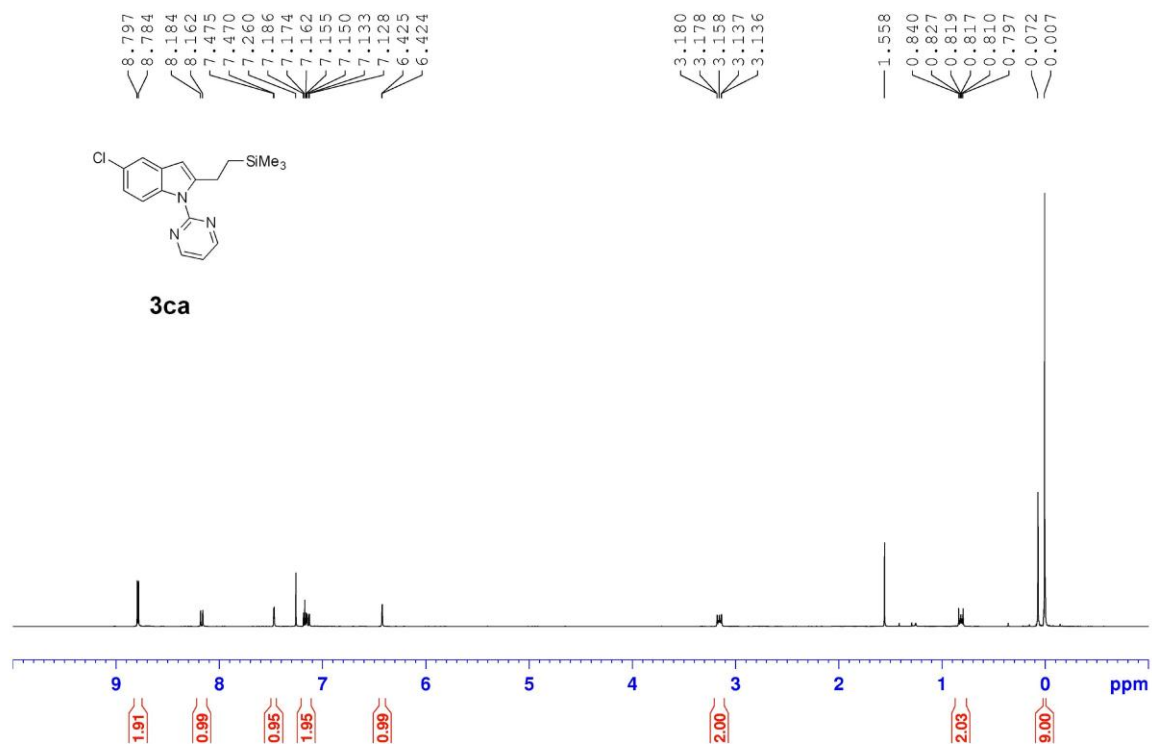

DZH-05-119 <sup>13</sup>C NMR CDCl<sub>3</sub> BBOF1 400MHz

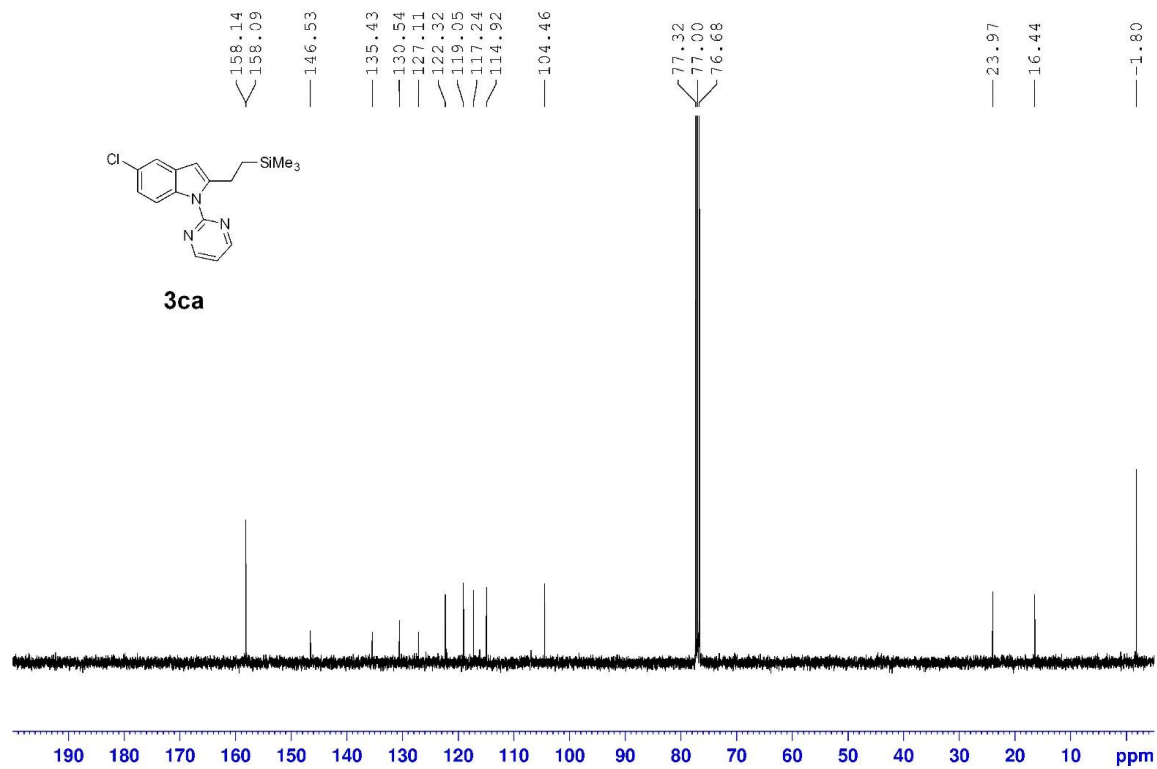

DZH-05-097-2 1H NMR CDC13 BBOF1 400MHz

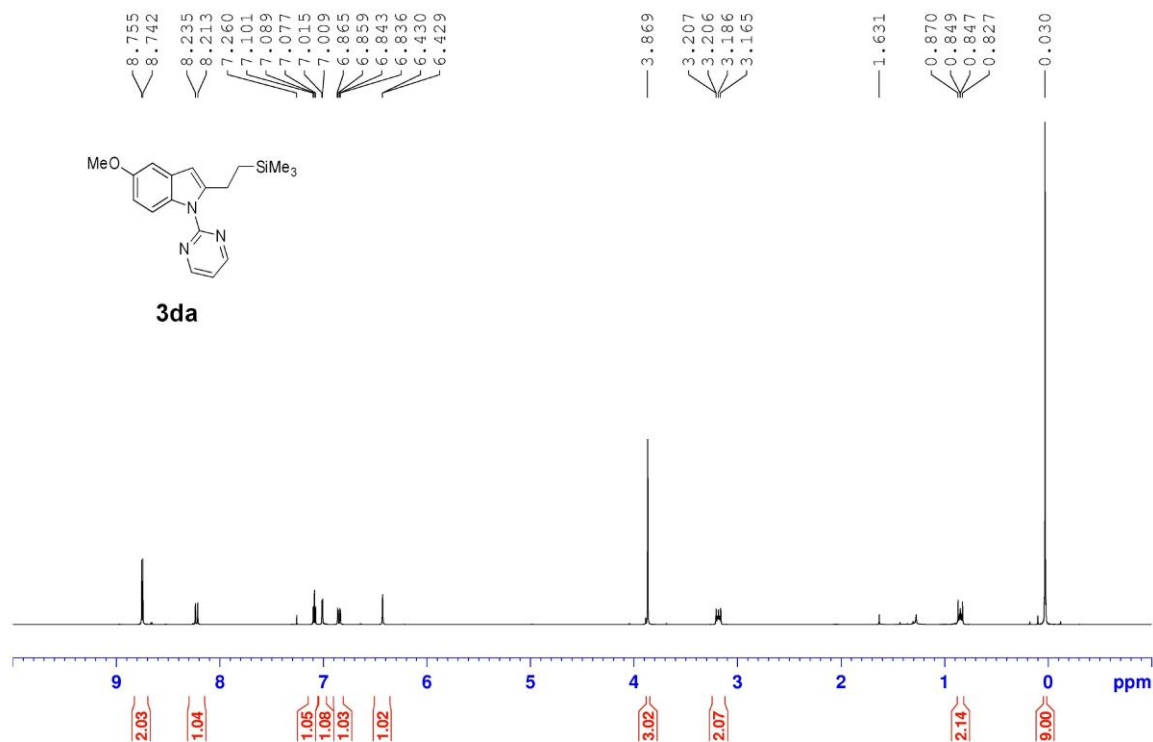

DZH-05-097-2 13C NMR CDC13 BBOF1 400MHz

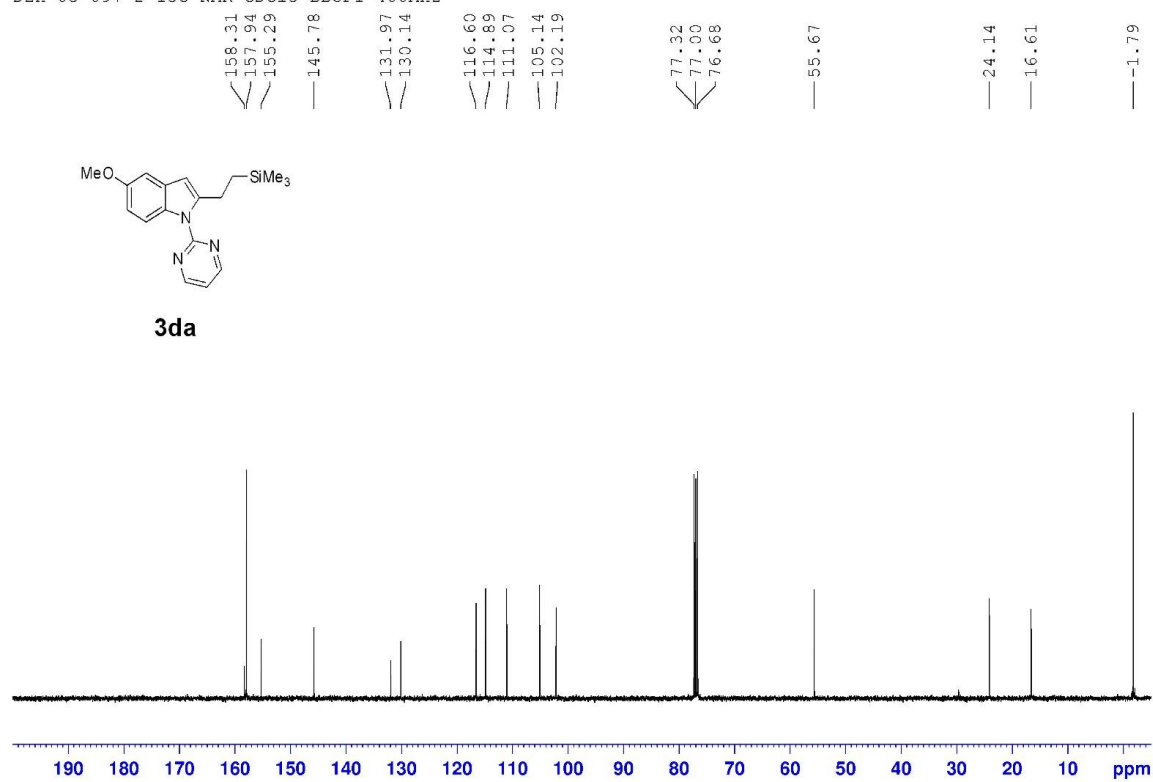

DZH-05-112 <sup>1</sup>H NMR CDCl<sub>3</sub> BBOF1 400MHz

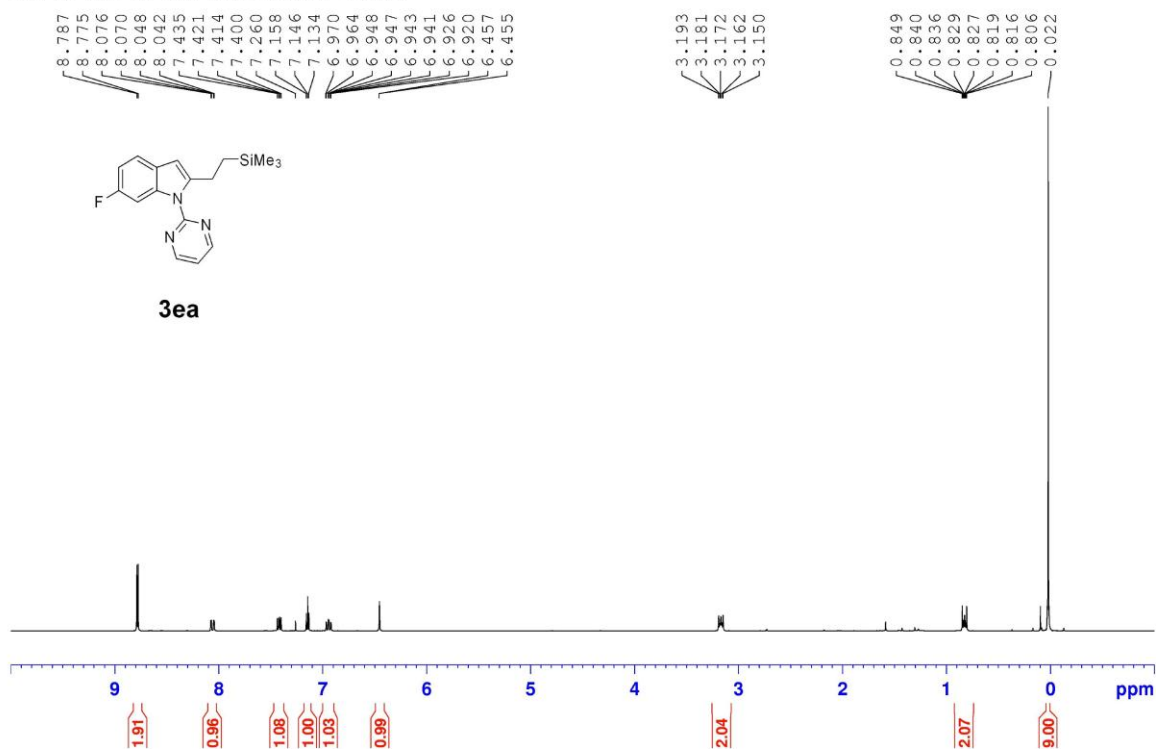

DZH-05-112 <sup>13</sup>C NMR CDCl<sub>3</sub> BBOF1 400MHz

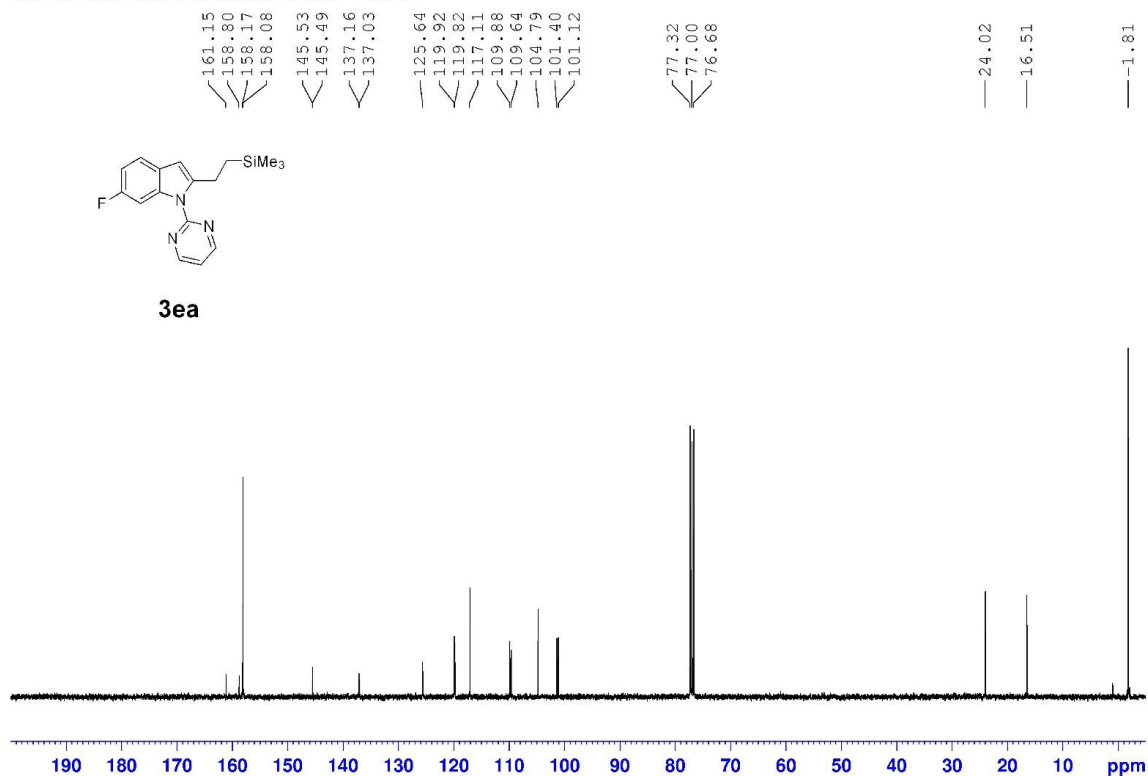

DZH-05-098 <sup>1</sup>H NMR CDCl<sub>3</sub> BBOF1 400MHz

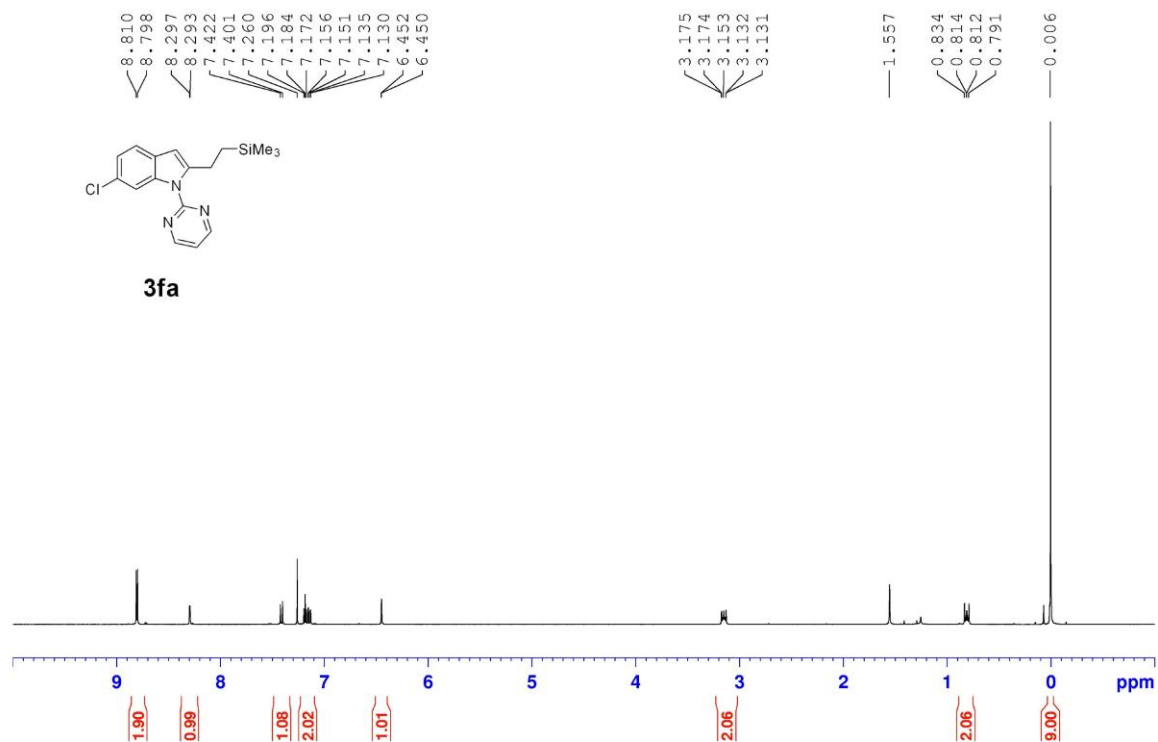

DZH-05-098 <sup>13</sup>C NMR CDCl<sub>3</sub> BBOF1 400MHz

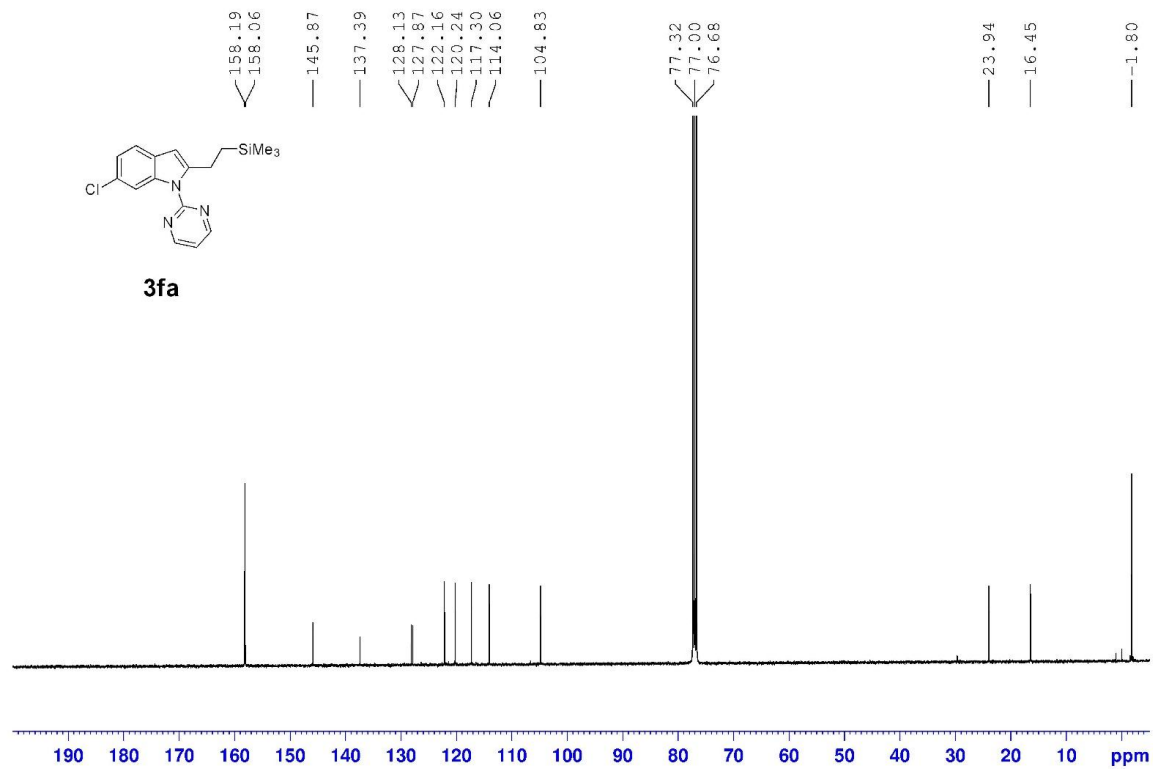

DZH-05-109 <sup>1</sup>H NMR 400MHz BBFO2

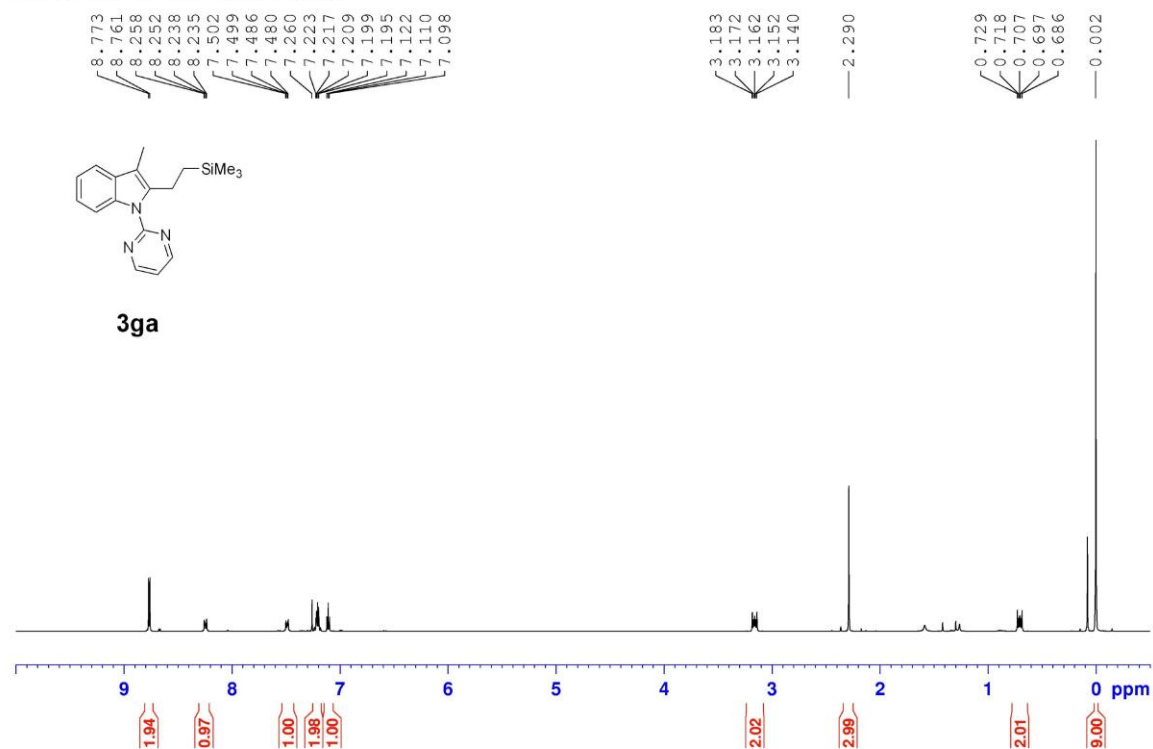

DZH-05-109 <sup>13</sup>C NMR CDCl<sub>3</sub> BBOF1 400MHz

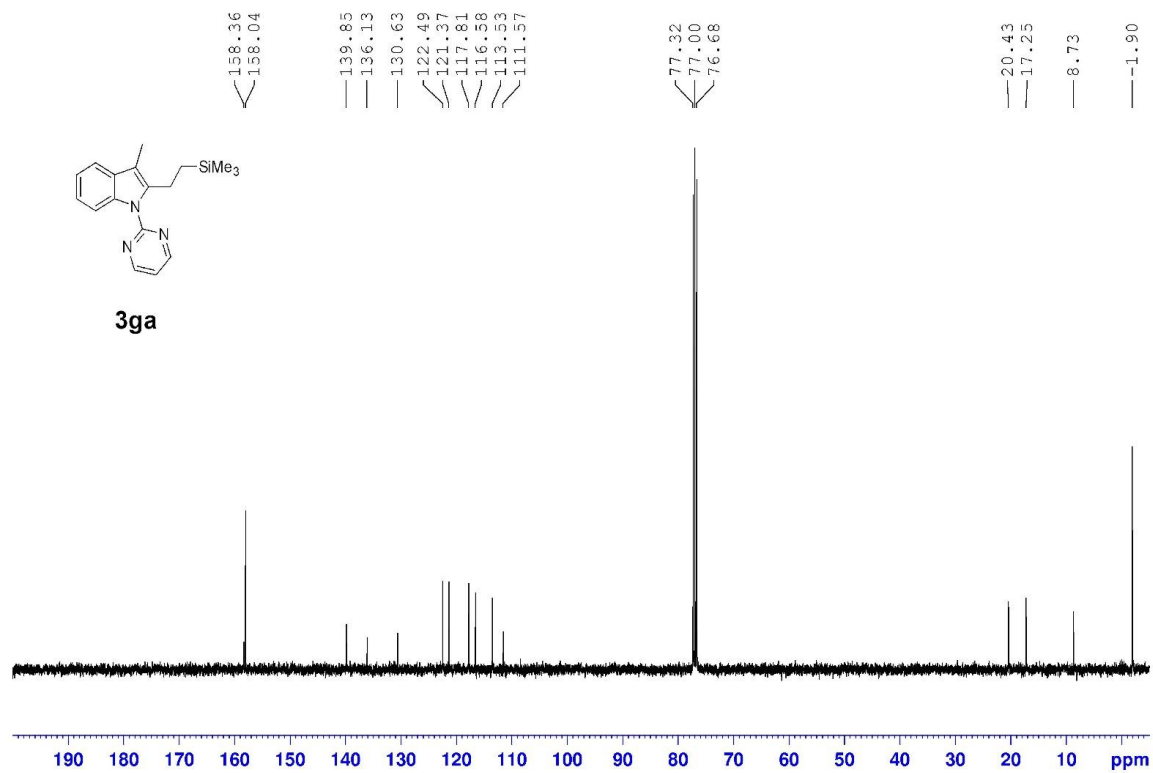



DZH-05-128 <sup>1</sup>H NMR CDCl<sub>3</sub> BBOF1 400MHz

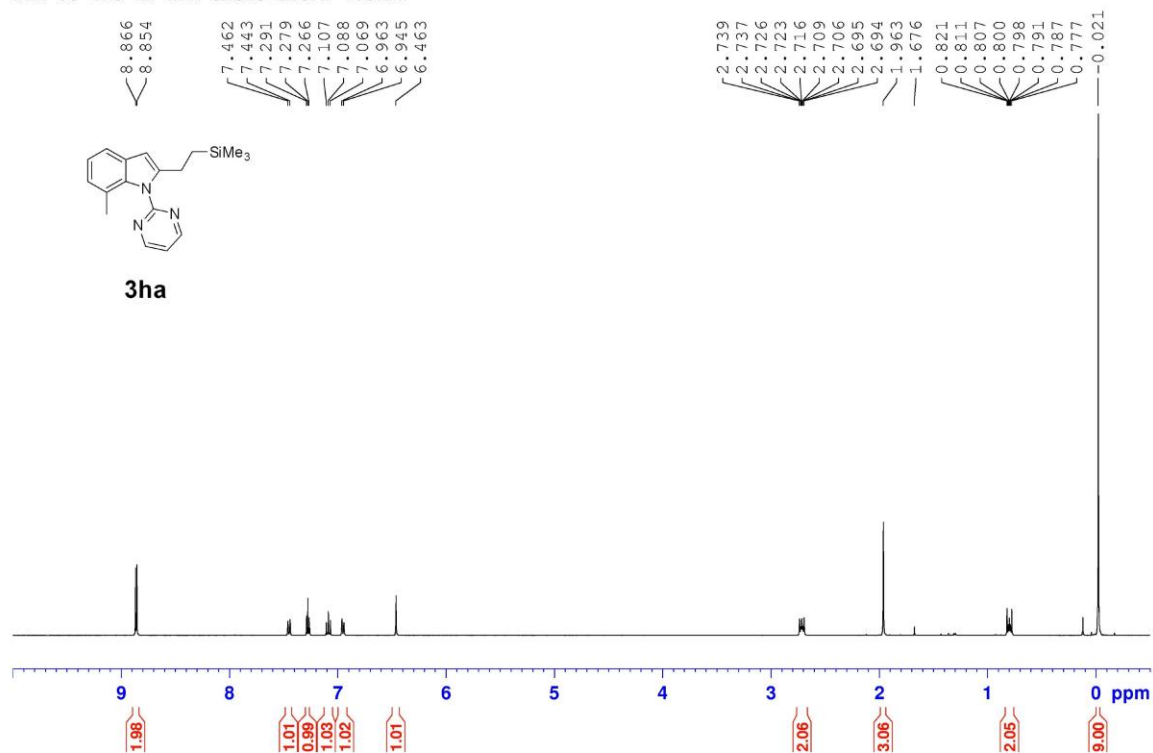

DZH-05-128 <sup>13</sup>C NMR CDCl<sub>3</sub> BBOF1 400MHz

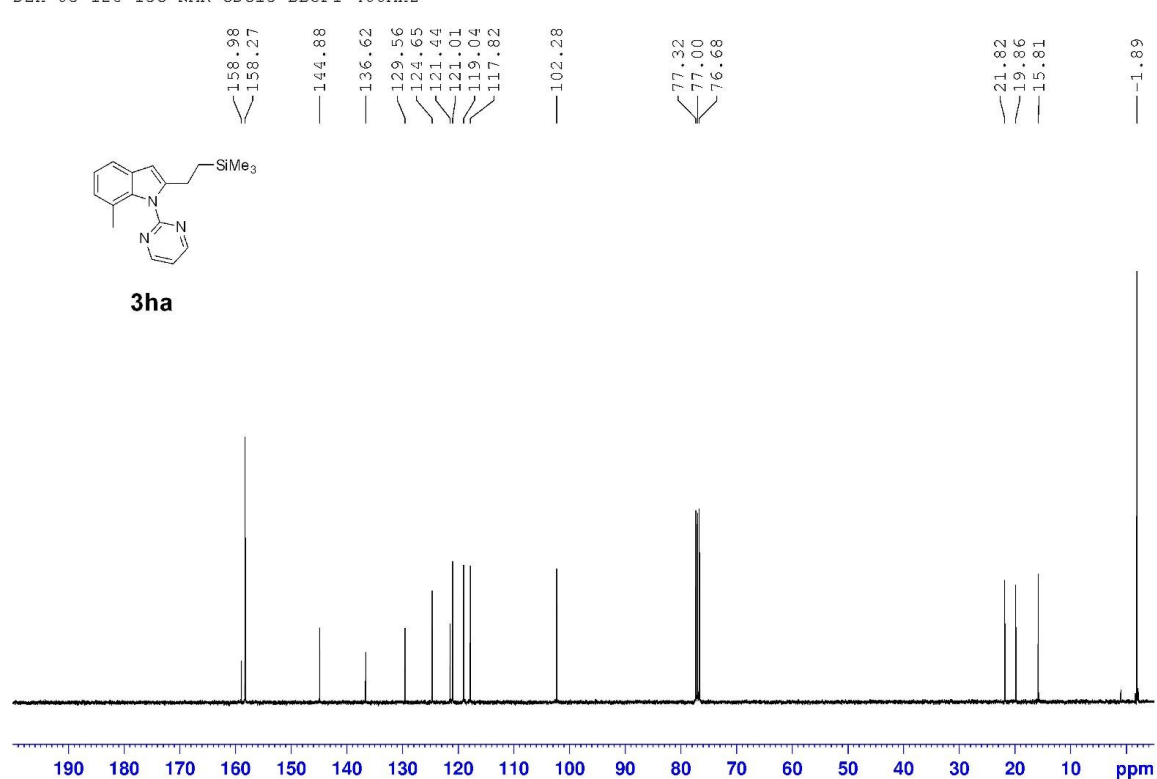

DZH-05-117 <sup>1</sup>H NMR CDCl<sub>3</sub> BBOF1 400MHz

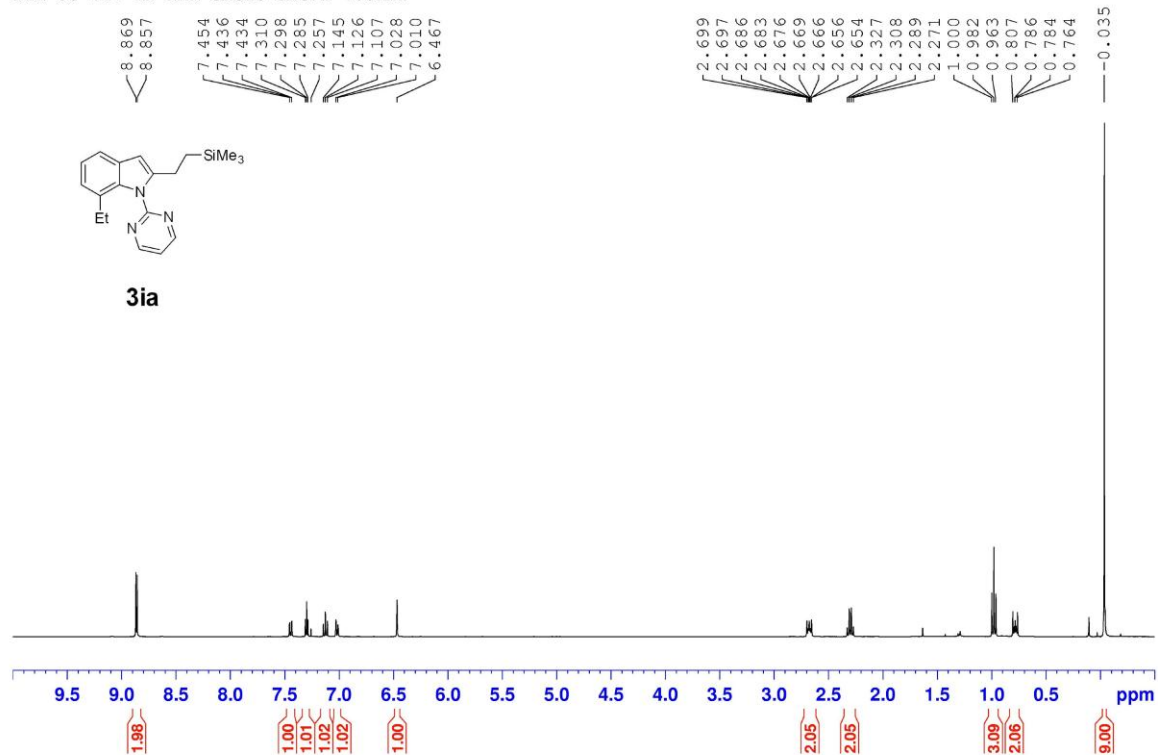

DZH-05-117 <sup>13</sup>C NMR CDCl<sub>3</sub> BBOF1 400MHz

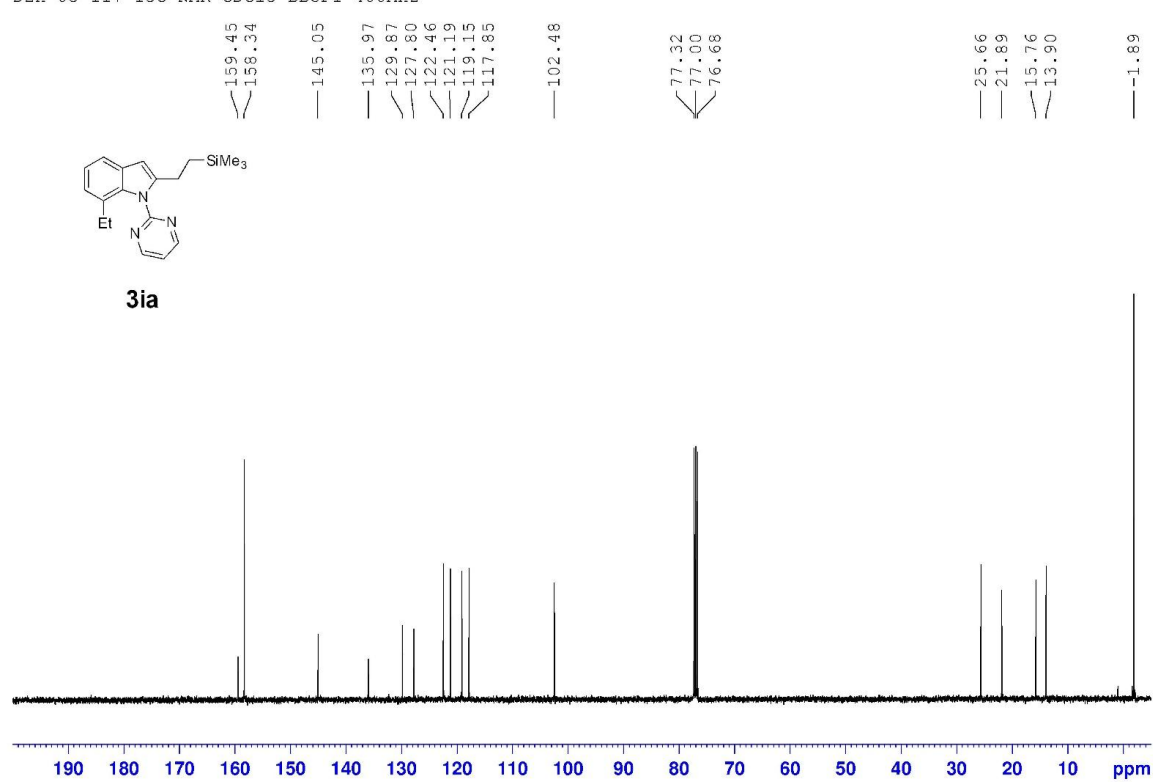

DZH-05-118 <sup>1</sup>H NMR CDCl<sub>3</sub> BBOF1 400MHz

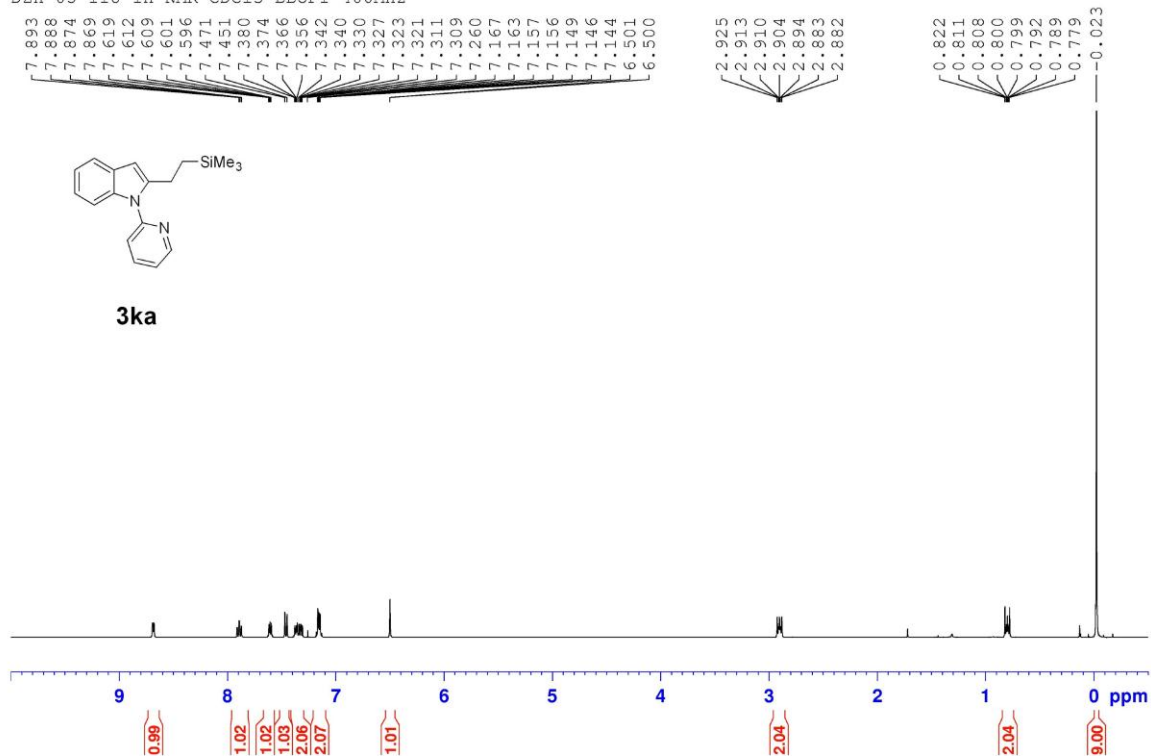

DZH-05-118 <sup>13</sup>C NMR CDCl<sub>3</sub> BBOF1 400MHz

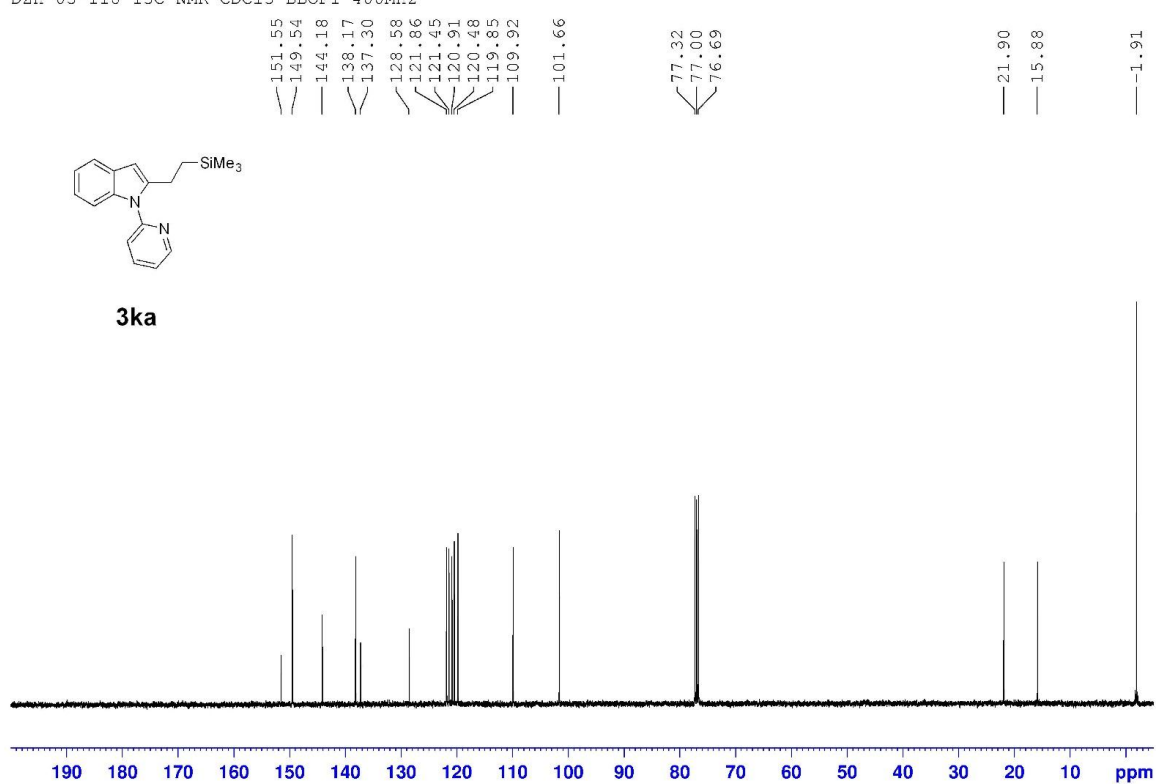

DZH-05-129 <sup>1</sup>H NMR CDCl<sub>3</sub> BBOF1 400MHz

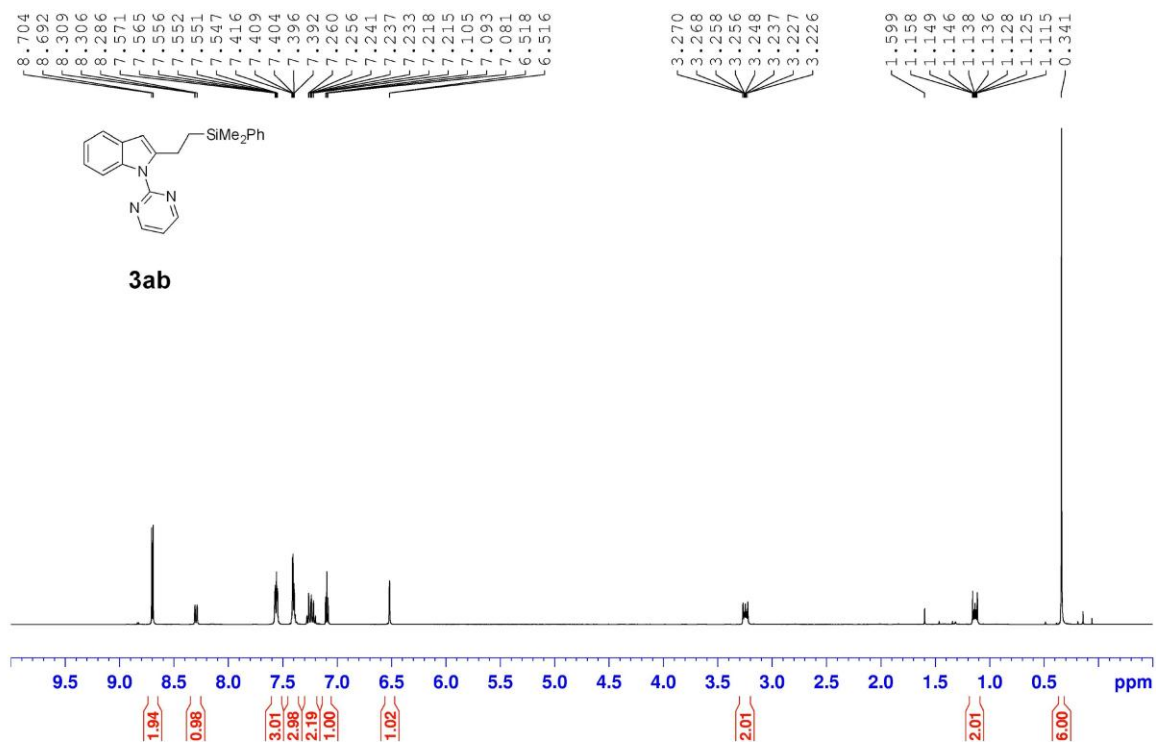

DZH-05-129 <sup>13</sup>C NMR CDCl<sub>3</sub> BBOF1 400MHz

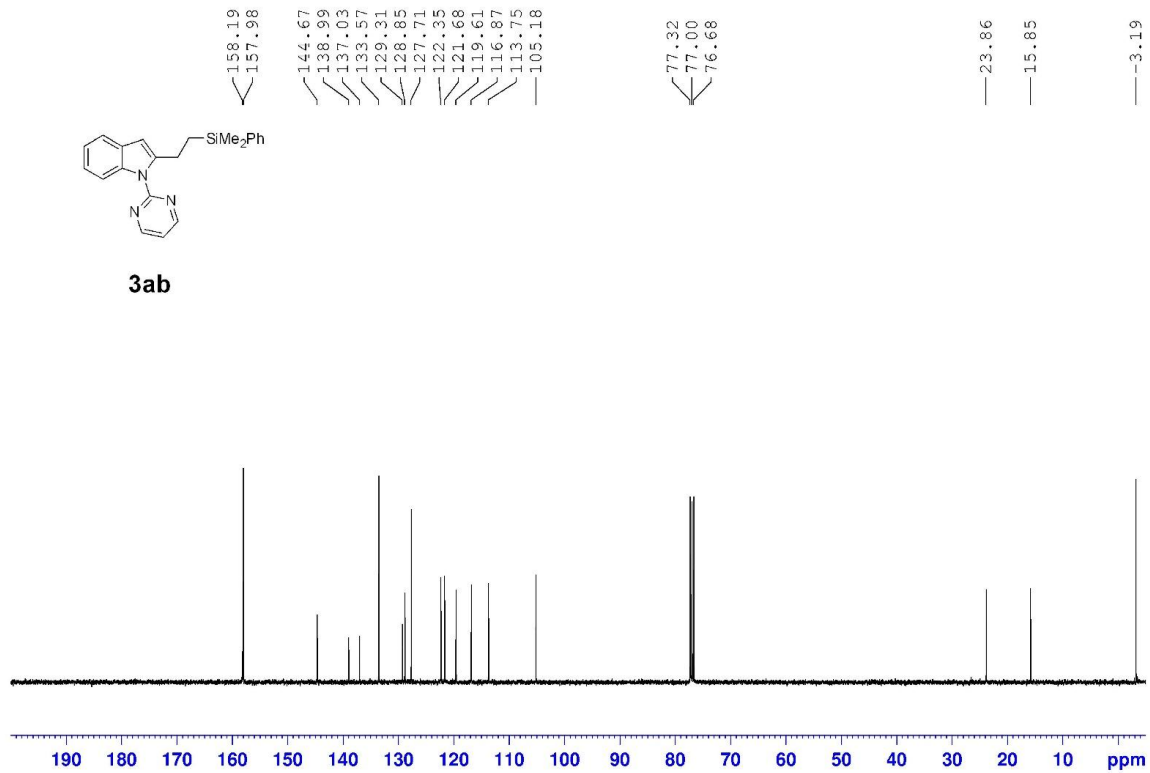

DZH-05-130 1H NMR CDCl3 BBOF1 400MHz

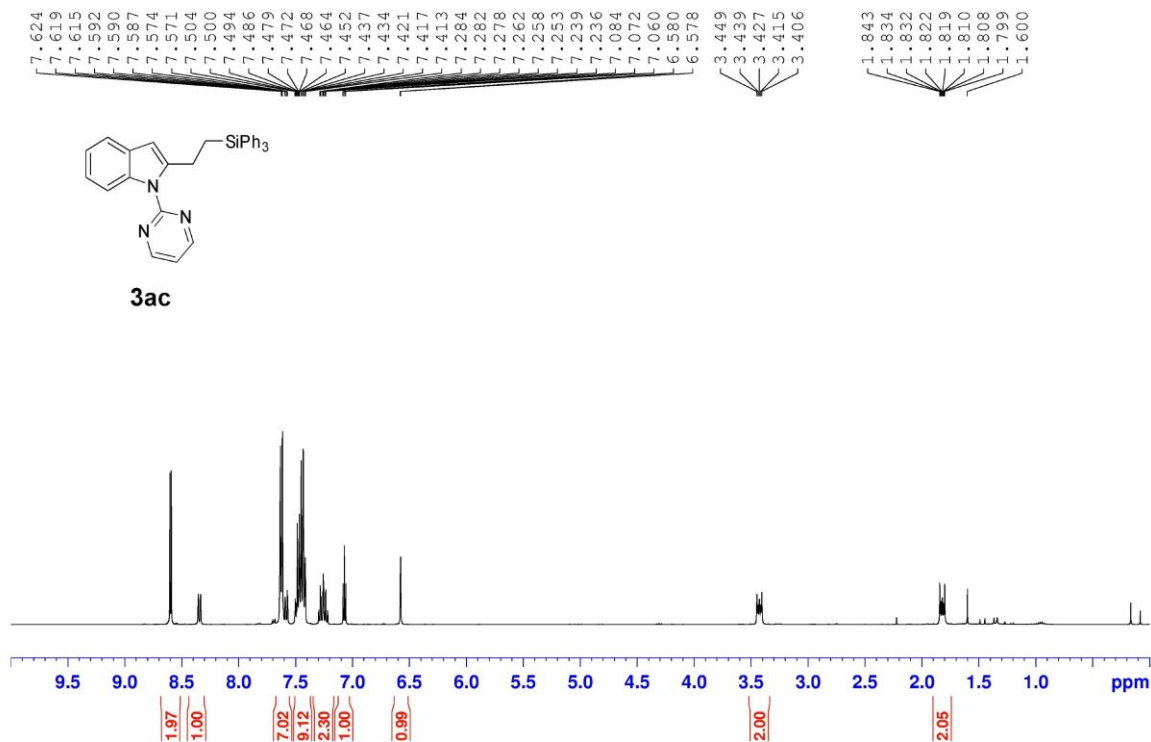

DZH-05-130 13C NMR CDCl3 BBOF1 400MHz

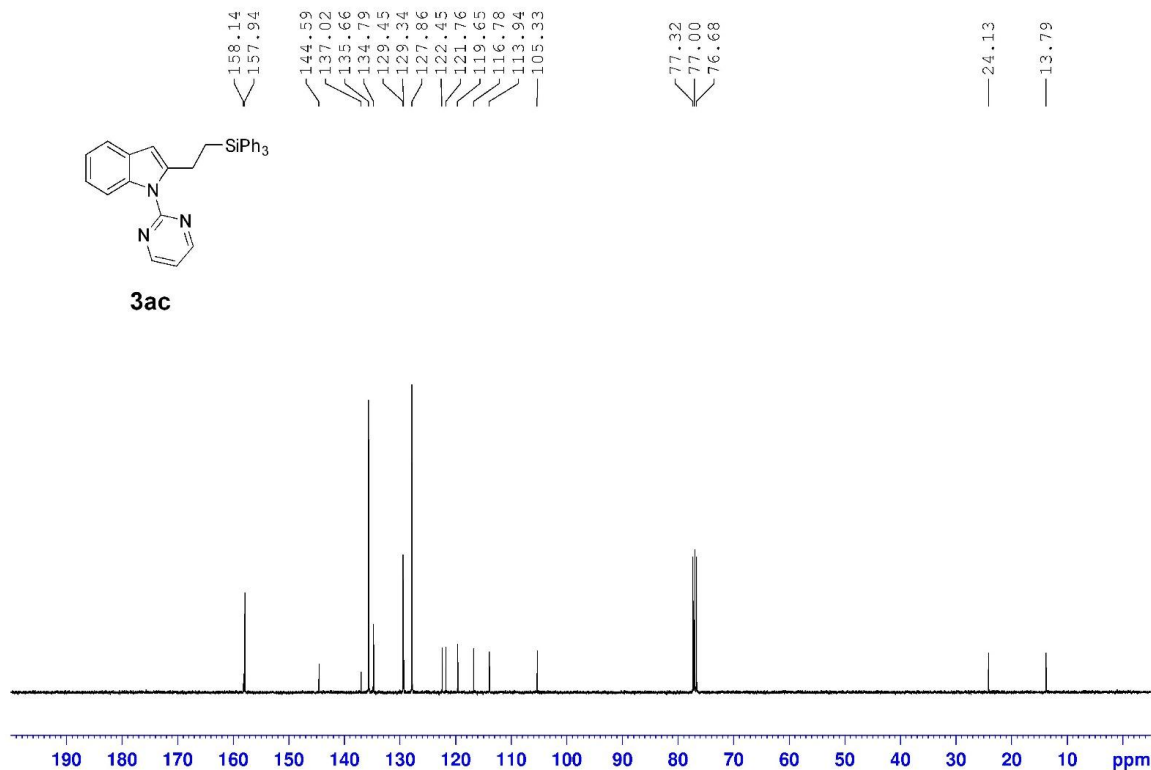

DZH-05-127 <sup>1</sup>H NMR CDCl<sub>3</sub> BBOF1 400MHz

8.820  
8.808  
8.078  
8.056  
7.554  
7.551  
7.539  
7.535  
7.260  
7.205  
7.201  
7.187  
7.183  
7.173  
7.170  
7.166  
7.161  
7.149  
6.487

3.708  
3.693  
3.686  
3.672  
2.375  
2.293  
1.645  
1.639  
1.629  
1.590  
1.579  
1.564  
1.558  
1.547  
1.541  
1.537  
1.378  
1.354  
1.335  
1.305  
1.273  
1.265  
1.261  
1.247  
1.243  
1.171

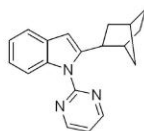

**3ad**

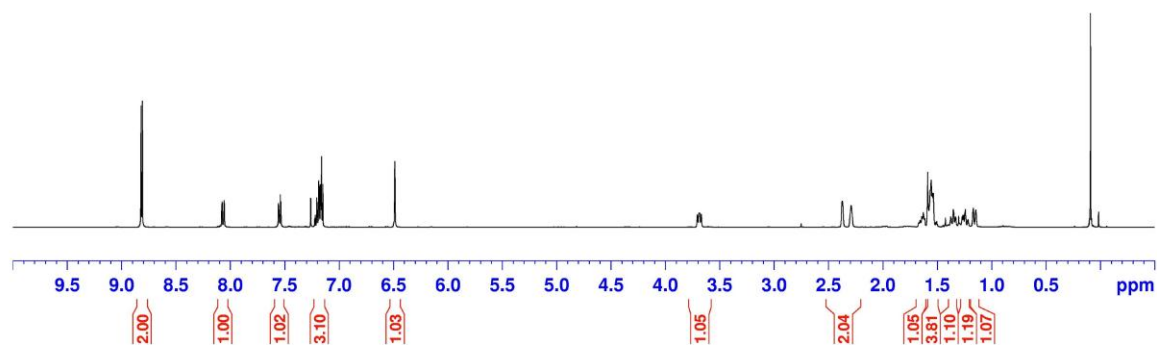

DZH-05-127 <sup>13</sup>C NMR CDCl<sub>3</sub> BBOF1 400MHz

158.38  
158.15  
146.87  
137.21  
129.07  
122.29  
121.50  
119.77  
117.26  
112.92  
103.25

77.32  
77.00  
76.68

42.30  
40.56  
38.13  
36.84  
36.13  
29.70  
28.90

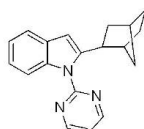

**3ad**

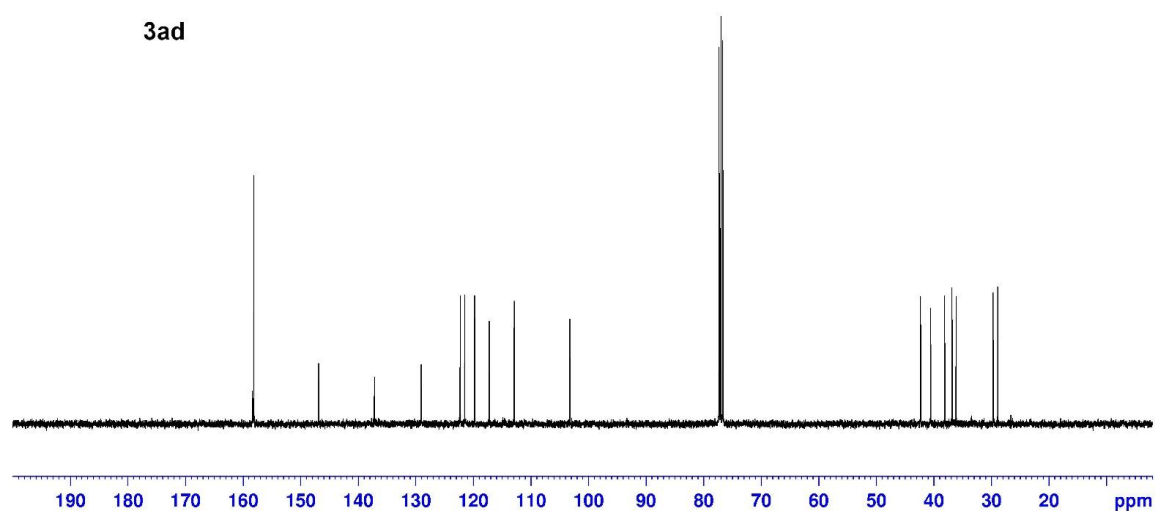

DZH-05-133 <sup>1</sup>H NMR CDCl<sub>3</sub> 400 MHz BBFO1

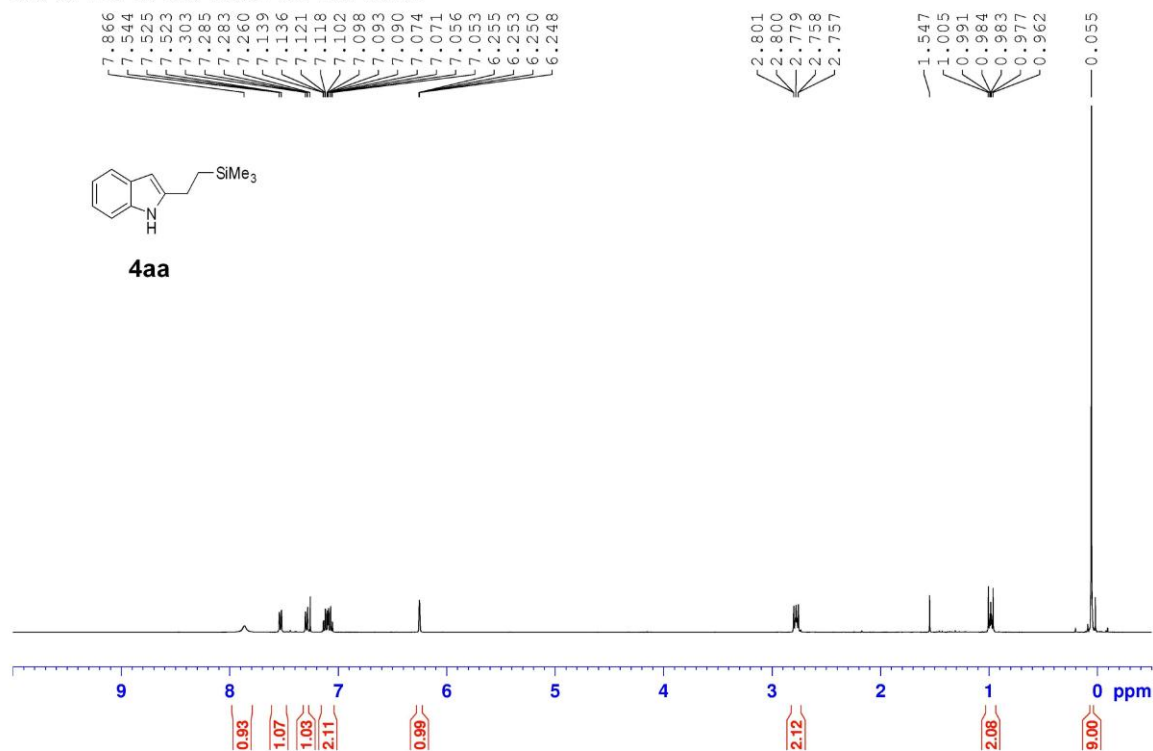

DZH-05-133 <sup>13</sup>C NMR CDCl<sub>3</sub> 400 MHz BBFO1

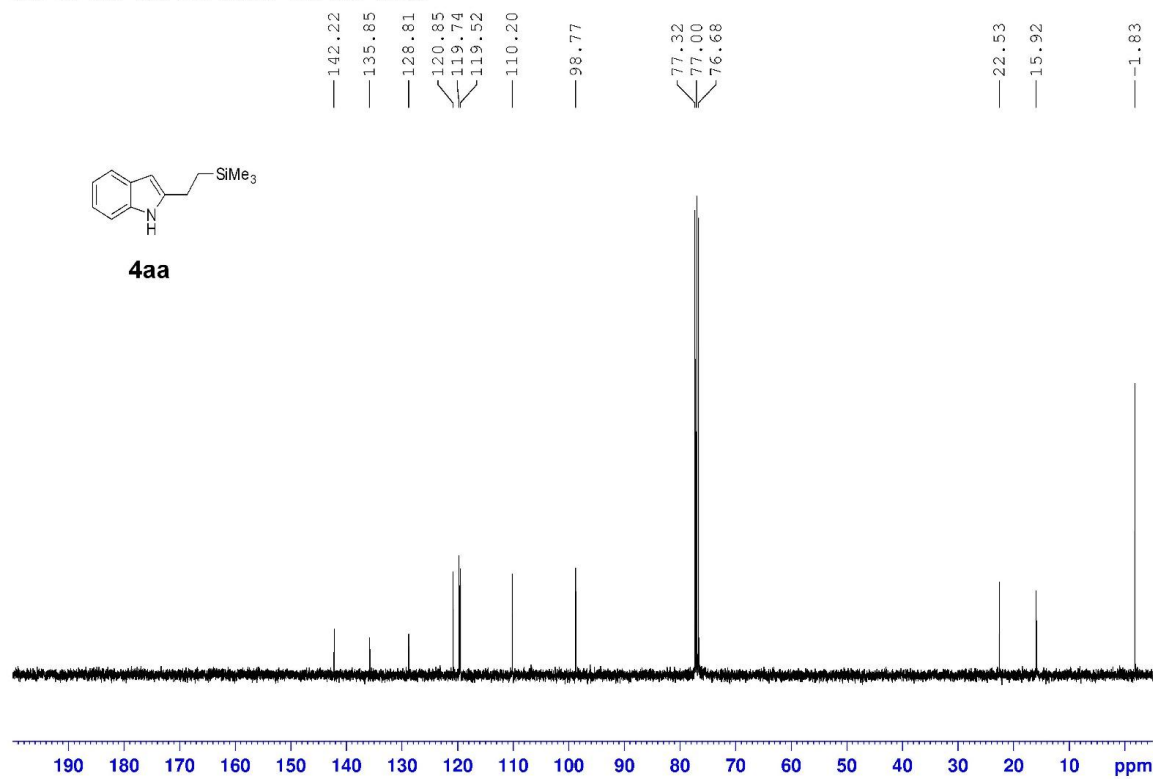

Supplement: Additional file 1 [file 1860-5397-8-174-S1.pdf]
